# Supplementary material for: In situ grown CoS on nickel foam pre-deposited with sulphur as an efficient OER electrocatalyst
Source: Royal Society of Chemistry journal article supplement (doi:10.1039/d0nj05156j), 2020-12-16
Supplement: d0nj05156j1.pdf [file d0nj05156j1.pdf]

## Supporting Information

### **In-situ Grown CoS on Nickel Foam Pre-deposited with Sulphur as Efficient OER Electrocatalyst**

Rui Guo<sup>a,b,c</sup>, Shengqi Zhang<sup>a,c,\*</sup>, Hui Wen<sup>a,c</sup>, Zhiyuan Ni<sup>a</sup>, Yan He<sup>a,c</sup>, Tao Yu<sup>a,c</sup>,  
Junhua You<sup>d</sup>

*<sup>a</sup>School of Materials Science and Engineering, Northeastern University,  
Shenyang 110819, China*

*<sup>b</sup>Key Laboratory of Advanced Energy Materials Chemistry (Ministry of Education), College of  
Chemistry, Nankai University, Tianjin 300071, China*

*<sup>c</sup>School of Resources and Materials, Northeastern University at Qinhuangdao,  
Qinhuangdao 066004, China*

*<sup>d</sup>School of Materials Science and Engineering, Shenyang University of Technology,  
Shenyang 110870, China*

\*Corresponding author:

zsqa2354zsqa@126.com (S. Zhang)

## 1. Supplementary Figures

### Supplementary Figure S1

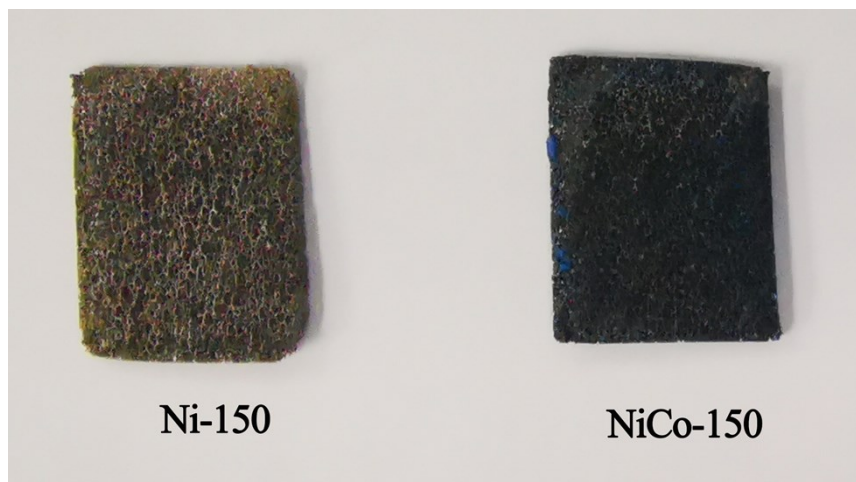

Supplementary Figure S1. Comparison of sample color before and after electrodeposition

### Supplementary Figure S2

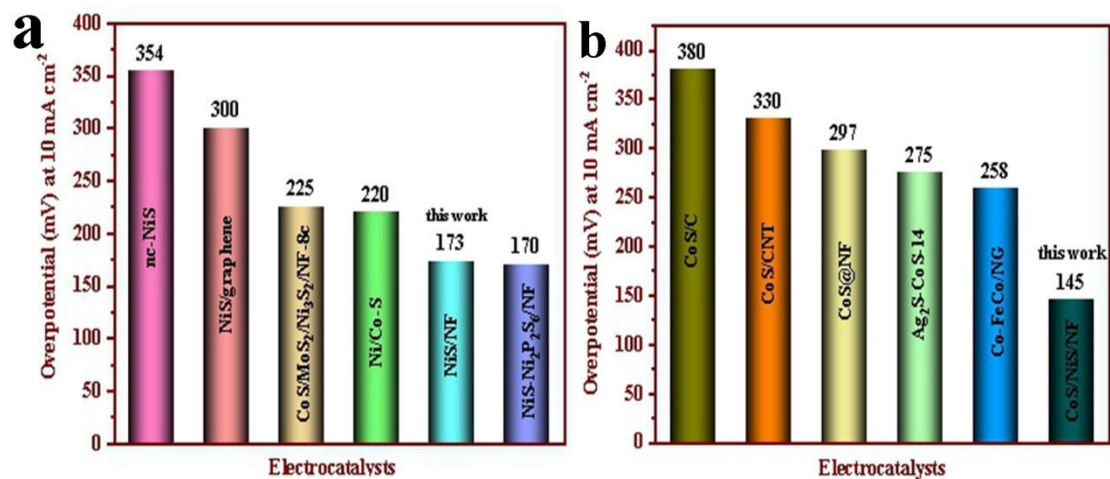

Supplementary Figure S2. Comparison of OER overpotentials of some Ni-based catalysts (a), Comparison of OER overpotentials of some Co-based catalysts (b).

**Supplementary Figure S3**

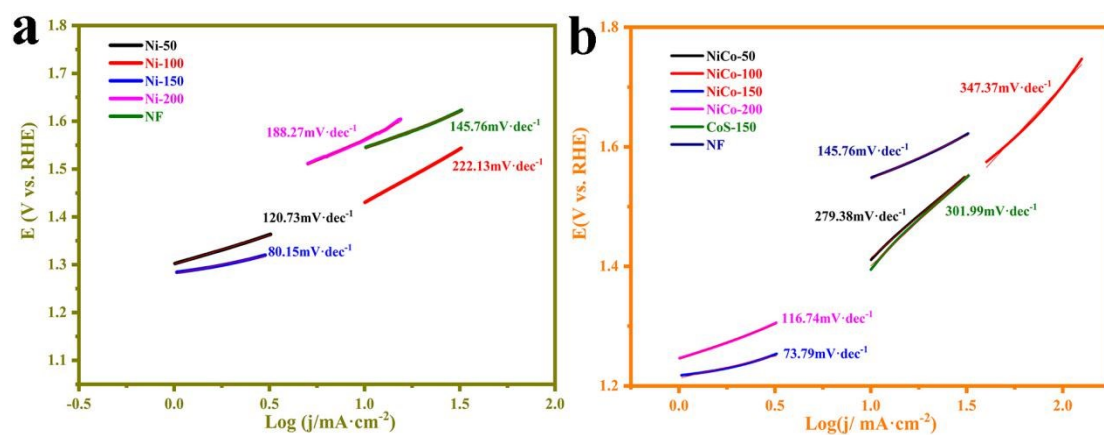

**Supplementary Figure S3.** Tafel slope of Ni-x samples (a) and Tafel slope of NiCo-y samples (b).

**Supplementary Figure S4**

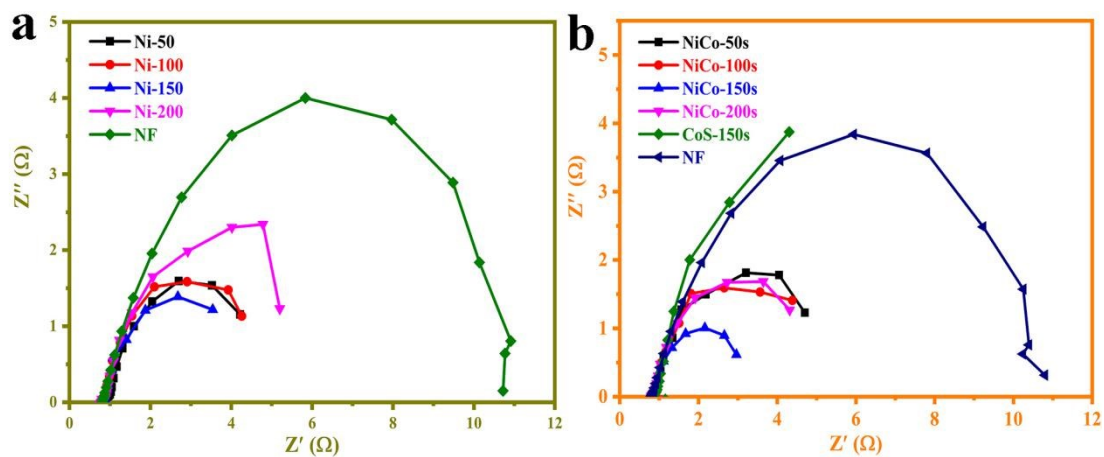

**Supplementary Figure S4.** Nyquist of Ni-x samples (a) and Nyquist of NiCo-y samples (b).

### Supplementary Figure S5

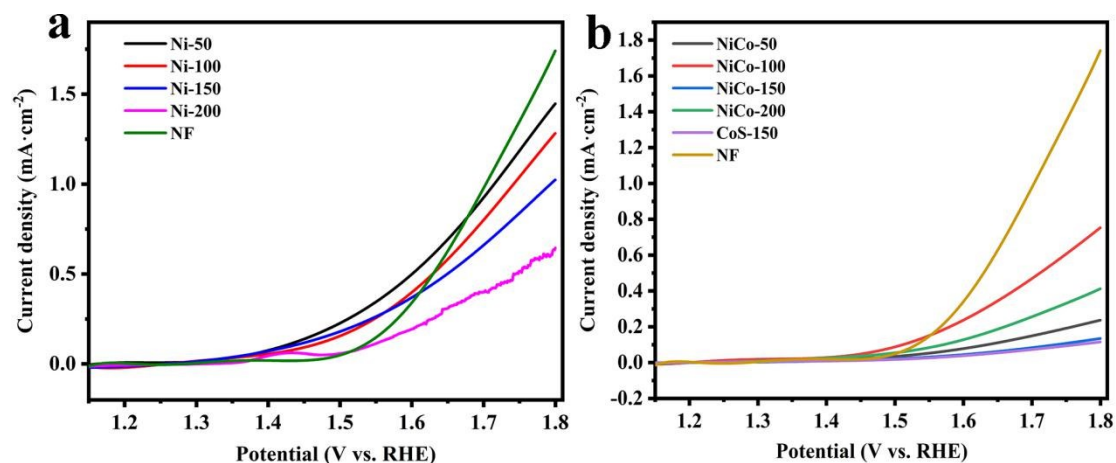

Supplementary Figure S5. Ni-x LSV normalization (a) and NiCo-y LSV normalization (b).

### Supplementary Figure S6

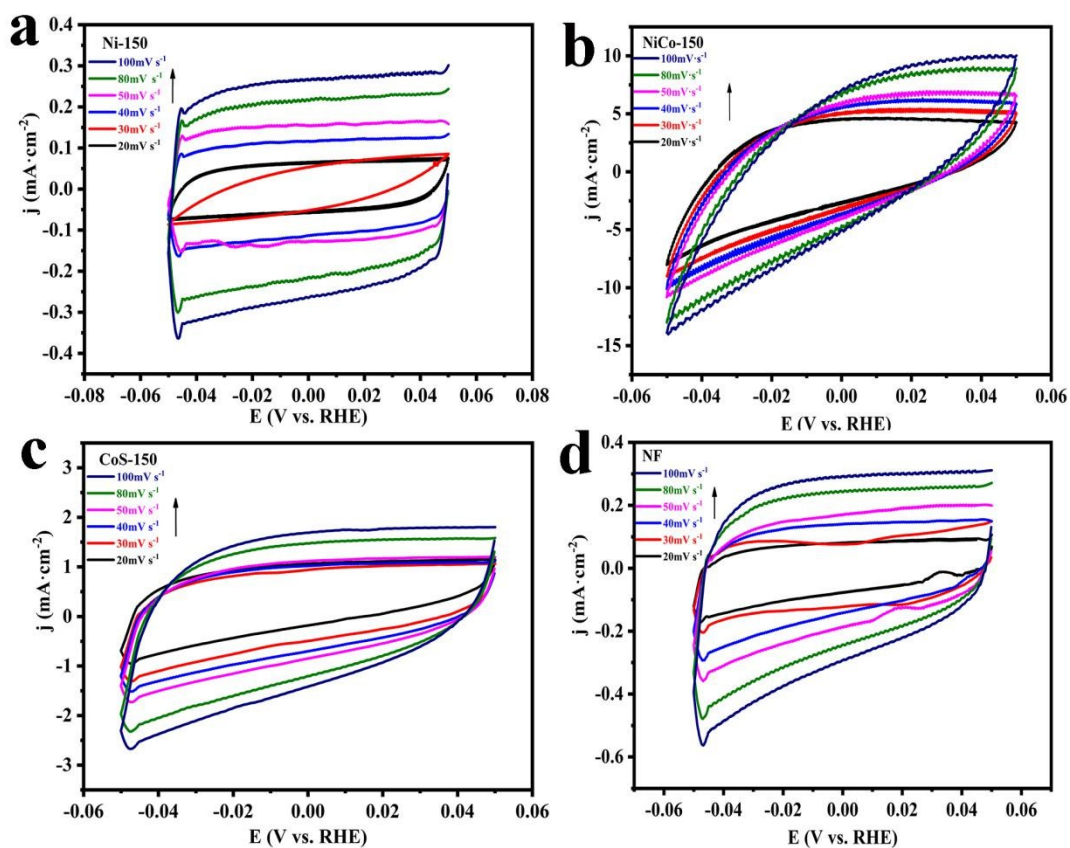

Supplementary Figure S6. CV curves of Ni-150 (a), CV curves of NiCo-150 (b), CV curves of CoS-150 (c) and CV curves of NF (d).
